# Supplementary material for: Identification and Genomic Characterization of Parvovirus B19V Genotype 3 Viruses from Cases of Meningoencephalitis in West Bengal, India
Source: PubMed Central journal article supplement (PMC9045363; doi:10.1128/spectrum.02251-21), 2022-04-12
Supplement: spectrum.02251-21-s0001.pdf [file spectrum.02251-21-s0001.pdf]

## Supplementary Material

Supplementary Material for **Identification and genomic characterization of Parvovirus B19V genotype 3 viruses from cases of meningoencephalitis in West Bengal, India** by Pattabiraman et al.

Appendix 1: Metadata for complete genomes of Primate Erythroparvovirus 1 sequences (B19V) used in the study

Appendix 2: Details of cases positive for B19V by PCR

Appendix 3: Description of PCR results and recovered genomes

Appendix 4 : List of unique SNPs in B19V genomes from the study

**Appendix 1 : Metadata for complete genomes of Primate Erythroparvovirus 1 sequences (B19V) used in the study**

| Sr. No | Accession  | Release Date | Isolation Source | Collection Date | Submitters                                                                                              |
|--------|------------|--------------|------------------|-----------------|---------------------------------------------------------------------------------------------------------|
| 1      | KF724386.1 | 2014-08-11   | blood            | 2006            | Eis-Hubinger,A.M., Hofmann,J.                                                                           |
| 2      | KC013303.1 | 2013-08-17   | bone             | 2007            | da Costa,A.C., Bendit,I., de Oliveira,A.C., Kallas,E.G., Sabino,E.C., Sanabani,S.S., de Oliveira,A.C.S. |
| 3      | KC013340.1 | 2013-08-17   | bone             | 2007            | da Costa,A.C., Bendit,I., de Oliveira,A.C., Kallas,E.G., Sabino,E.C., Sanabani,S.S., de Oliveira,A.C.S. |
| 4      | KC013343.1 | 2013-08-17   | bone             | 2007            | da Costa,A.C., Bendit,I., de Oliveira,A.C., Kallas,E.G., Sabino,E.C., Sanabani,S.S., de Oliveira,A.C.S. |
| 5      | KF724387.1 | 2014-08-11   | blood            | 2008            | Eis-Hubinger,A.M., Hofmann,J.                                                                           |
| 6      | KC013312.1 | 2013-08-17   | bone             | 2008            | da Costa,A.C., Bendit,I., de Oliveira,A.C., Kallas,E.G., Sabino,E.C., Sanabani,S.S., de Oliveira,A.C.S. |
| 7      | KC013332.1 | 2013-08-17   | bone             | 2008            | da Costa,A.C., Bendit,I., de Oliveira,A.C., Kallas,E.G., Sabino,E.C., Sanabani,S.S., de Oliveira,A.C.S. |
| 8      | FJ591158.1 | 2009-01-13   |                  | 2008            | Chen,Z., Guan,W., Kleiboeker,S., Qiu,J.                                                                 |
| 9      | MH201455.1 | 2019-01-21   |                  | 2009            | Matz,B., Kupfer,B., Kallies,R., Kulshammer,M., Flotenmeyer,M., Kreil,T.R., Eis-Hubinger,A.M.            |
| 10     | MH201456.1 | 2019-01-21   |                  | 2009            | Matz,B., Kupfer,B., Kallies,R., Kulshammer,M., Flotenmeyer,M., Kreil,T.R., Eis-Hubinger,A.M.            |
| 11     | KR005643.1 | 2015-09-30   | blood            | 2009            | Joksic,I.D., Stamenkovic,G.G., Nikolic,V.S., Siljic,M.M., Nestic,M.S., Stanojevic,M.P.                  |
| 12     | KC013306.1 | 2013-08-17   | bone             | 2009            | da Costa,A.C., Bendit,I., de Oliveira,A.C., Kallas,E.G., Sabino,E.C., Sanabani,S.S., de Oliveira,A.C.S. |
| 13     | KC013308.1 | 2013-08-17   | bone             | 2009            | da Costa,A.C., Bendit,I., de Oliveira,A.C., Kallas,E.G., Sabino,E.C., Sanabani,S.S., de Oliveira,A.C.S. |
| 14     | KC013310.1 | 2013-08-17   | bone             | 2009            | da Costa,A.C., Bendit,I., de Oliveira,A.C., Kallas,E.G., Sabino,E.C., Sanabani,S.S., de Oliveira,A.C.S. |
| 15     | KC013313.1 | 2013-08-17   | bone             | 2009            | da Costa,A.C., Bendit,I., de Oliveira,A.C., Kallas,E.G., Sabino,E.C., Sanabani,S.S., de Oliveira,A.C.S. |
| 16     | KC013314.1 | 2013-08-17   | bone             | 2009            | da Costa,A.C., Bendit,I., de Oliveira,A.C., Kallas,E.G., Sabino,E.C., Sanabani,S.S., de Oliveira,A.C.S. |
| 17     | KC013316.1 | 2013-08-17   | bone             | 2009            | da Costa,A.C., Bendit,I., de Oliveira,A.C., Kallas,E.G., Sabino,E.C., Sanabani,S.S., de Oliveira,A.C.S. |
| 18     | KC013321.1 | 2013-08-17   | bone             | 2009            | da Costa,A.C., Bendit,I., de Oliveira,A.C., Kallas,E.G., Sabino,E.C., Sanabani,S.S., de Oliveira,A.C.S. |
| 19     | KC013322.1 | 2013-08-17   | bone             | 2009            | da Costa,A.C., Bendit,I., de Oliveira,A.C., Kallas,E.G., Sabino,E.C., Sanabani,S.S., de                 |

| Sr. No | Accession  | Release Date | Isolation Source | Collection Date | Submitters                                                                                              |
|--------|------------|--------------|------------------|-----------------|---------------------------------------------------------------------------------------------------------|
|        |            |              |                  |                 | Oliveira,A.C.S.                                                                                         |
| 20     | KC013324.1 | 2013-08-17   | bone             | 2009            | da Costa,A.C., Bendit,I., de Oliveira,A.C., Kallas,E.G., Sabino,E.C., Sanabani,S.S., de Oliveira,A.C.S. |
| 21     | KC013328.1 | 2013-08-17   | bone             | 2009            | da Costa,A.C., Bendit,I., de Oliveira,A.C., Kallas,E.G., Sabino,E.C., Sanabani,S.S., de Oliveira,A.C.S. |
| 22     | KC013329.1 | 2013-08-17   | bone             | 2009            | da Costa,A.C., Bendit,I., de Oliveira,A.C., Kallas,E.G., Sabino,E.C., Sanabani,S.S., de Oliveira,A.C.S. |
| 23     | KC013331.1 | 2013-08-17   | bone             | 2009            | da Costa,A.C., Bendit,I., de Oliveira,A.C., Kallas,E.G., Sabino,E.C., Sanabani,S.S., de Oliveira,A.C.S. |
| 24     | KC013338.1 | 2013-08-17   | bone             | 2009            | da Costa,A.C., Bendit,I., de Oliveira,A.C., Kallas,E.G., Sabino,E.C., Sanabani,S.S., de Oliveira,A.C.S. |
| 25     | KC013344.1 | 2013-08-17   | bone             | 2009            | da Costa,A.C., Bendit,I., de Oliveira,A.C., Kallas,E.G., Sabino,E.C., Sanabani,S.S., de Oliveira,A.C.S. |
| 26     | KC013305.1 | 2013-08-17   | bone             | 2010            | da Costa,A.C., Bendit,I., de Oliveira,A.C., Kallas,E.G., Sabino,E.C., Sanabani,S.S., de Oliveira,A.C.S. |
| 27     | KC013315.1 | 2013-08-17   | bone             | 2010            | da Costa,A.C., Bendit,I., de Oliveira,A.C., Kallas,E.G., Sabino,E.C., Sanabani,S.S., de Oliveira,A.C.S. |
| 28     | KC013323.1 | 2013-08-17   | bone             | 2010            | da Costa,A.C., Bendit,I., de Oliveira,A.C., Kallas,E.G., Sabino,E.C., Sanabani,S.S., de Oliveira,A.C.S. |
| 29     | KC013325.1 | 2013-08-17   | bone             | 2010            | da Costa,A.C., Bendit,I., de Oliveira,A.C., Kallas,E.G., Sabino,E.C., Sanabani,S.S., de Oliveira,A.C.S. |
| 30     | KC013326.1 | 2013-08-17   | bone             | 2010            | da Costa,A.C., Bendit,I., de Oliveira,A.C., Kallas,E.G., Sabino,E.C., Sanabani,S.S., de Oliveira,A.C.S. |
| 31     | KC013327.1 | 2013-08-17   | bone             | 2010            | da Costa,A.C., Bendit,I., de Oliveira,A.C., Kallas,E.G., Sabino,E.C., Sanabani,S.S., de Oliveira,A.C.S. |
| 32     | KC013333.1 | 2013-08-17   | bone             | 2010            | da Costa,A.C., Bendit,I., de Oliveira,A.C., Kallas,E.G., Sabino,E.C., Sanabani,S.S., de Oliveira,A.C.S. |
| 33     | KC013346.1 | 2013-08-17   | bone             | 2010            | da Costa,A.C., Bendit,I., de Oliveira,A.C., Kallas,E.G., Sabino,E.C., Sanabani,S.S., de Oliveira,A.C.S. |
| 34     | KC013351.1 | 2013-08-17   | bone             | 2010            | da Costa,A.C., Bendit,I., de Oliveira,A.C., Kallas,E.G., Sabino,E.C., Sanabani,S.S., de Oliveira,A.C.S. |
| 35     | KR005640.1 | 2015-09-30   | blood            | 2011            | Stamenkovic,G.G., Nikolic,V.S., Siljic,M.M., Nestic,M.S., Stanojevic,M.P.                               |
| 36     | KR005641.1 | 2015-09-30   | blood            | 2011            | Stamenkovic,G.G., Nikolic,V.S., Siljic,M.M., Nestic,M.S., Stanojevic,M.P.                               |
| 37     | KR005642.1 | 2015-09-30   | blood            | 2011            | Stamenkovic,G.G., Nikolic,V.S., Siljic,M.M., Nestic,M.S., Stanojevic,M.P.                               |
| 38     | KR005644.1 | 2015-09-30   | blood            | 2012            | Knezevic,A.M., Stamenkovic,G.G.,                                                                        |

| Sr. No | Accession  | Release Date | Isolation Source | Collection Date | Submitters                                                                                       |
|--------|------------|--------------|------------------|-----------------|--------------------------------------------------------------------------------------------------|
|        |            |              |                  |                 | Nikolic,V.S., Siljic,M.M., Nestic,M.S., Stanojevic,M.P.                                          |
| 39     | KM393163.1 | 2014-10-12   | blood            | 2013            | Qiu,Y., Kleiboeker,S., Li,B.                                                                     |
| 40     | KM393164.1 | 2014-10-12   | blood            | 2013            | Qiu,Y., Kleiboeker,S., Li,B.                                                                     |
| 41     | KM393165.1 | 2014-10-12   | blood            | 2013            | Qiu,Y., Kleiboeker,S., Li,B.                                                                     |
| 42     | KM393166.1 | 2014-10-12   | blood            | 2013            | Qiu,Y., Kleiboeker,S., Li,B.                                                                     |
| 43     | KM393167.1 | 2014-10-12   | blood            | 2013            | Qiu,Y., Kleiboeker,S., Li,B.                                                                     |
| 44     | KM393168.1 | 2014-10-12   | blood            | 2013            | Qiu,Y., Kleiboeker,S., Li,B.                                                                     |
| 45     | KM393169.1 | 2014-10-12   | blood            | 2013            | Qiu,Y., Kleiboeker,S., Li,B.                                                                     |
| 46     | KT310174.1 | 2015-12-06   |                  | 2014            | Zhang,L., Cai,C., Pan,F., Hong,L., Luo,X., Hu,S., Xu,J., Chen,Z.                                 |
| 47     | MT988397.1 | 2021-04-27   | bone             | 2015            | Toppinen,M., Sajantila,A., Pratas,D., Hedman,K., Perdomo,M.F.                                    |
| 48     | MT988398.1 | 2021-04-27   | bone             | 2015            | Toppinen,M., Sajantila,A., Pratas,D., Hedman,K., Perdomo,M.F.                                    |
| 49     | MT988399.1 | 2021-04-27   | bone             | 2015            | Toppinen,M., Sajantila,A., Pratas,D., Hedman,K., Perdomo,M.F.                                    |
| 50     | MT988400.1 | 2021-04-27   | bone             | 2015            | Toppinen,M., Sajantila,A., Pratas,D., Hedman,K., Perdomo,M.F.                                    |
| 51     | MT988401.1 | 2021-04-27   | bone             | 2015            | Toppinen,M., Sajantila,A., Pratas,D., Hedman,K., Perdomo,M.F.                                    |
| 52     | MT988402.1 | 2021-04-27   | bone             | 2015            | Toppinen,M., Sajantila,A., Pratas,D., Hedman,K., Perdomo,M.F.                                    |
| 53     | MT988403.1 | 2021-04-27   | bone             | 2015            | Toppinen,M., Sajantila,A., Pratas,D., Hedman,K., Perdomo,M.F.                                    |
| 54     | MT682520.1 | 2020-08-18   |                  | 2015            | Pratas,D., Toppinen,M., Pyoria,L., Hedman,K., Sajantilla,A., Perdomo,M.F.                        |
| 55     | MT410184.1 | 2020-08-04   |                  | 2015            | Toppinen,M., Pratas,D., Vaisanen,E., Soderlund-Venermo,M., Hedman,K., Perdomo,M.F., Sajantila,A. |
| 56     | MT410185.1 | 2020-08-04   |                  | 2015            | Toppinen,M., Pratas,D., Vaisanen,E., Soderlund-Venermo,M., Hedman,K., Perdomo,M.F., Sajantila,A. |
| 57     | MT410186.1 | 2020-08-04   |                  | 2015            | Toppinen,M., Pratas,D., Vaisanen,E., Soderlund-Venermo,M., Hedman,K., Perdomo,M.F., Sajantila,A. |
| 58     | MT410187.1 | 2020-08-04   |                  | 2015            | Toppinen,M., Pratas,D., Vaisanen,E., Soderlund-Venermo,M., Hedman,K., Perdomo,M.F., Sajantila,A. |
| 59     | MT410188.1 | 2020-08-04   |                  | 2015            | Toppinen,M., Pratas,D., Vaisanen,E., Soderlund-Venermo,M., Hedman,K., Perdomo,M.F., Sajantila,A. |
| 60     | MT410189.1 | 2020-08-04   |                  | 2015            | Toppinen,M., Pratas,D., Vaisanen,E., Soderlund-Venermo,M., Hedman,K., Perdomo,M.F., Sajantila,A. |
| 61     | MT410190.1 | 2020-08-04   |                  | 2015            | Toppinen,M., Pratas,D., Vaisanen,E., Soderlund-Venermo,M., Hedman,K., Perdomo,M.F., Sajantila,A. |
| 62     | FN598217.1 | 2009-12-01   |                  | 2002-02-22      | Op de Beeck,A., Caillet-Fauquet,P., Baurin,S., Laub,R.                                           |
| 63     | JN211125.1 | 2012-08-14   |                  | 2003-03         | Molenaar-de Backer,M.W., Lukashov,V.V., van                                                      |

| Sr. No | Accession  | Release Date | Isolation Source | Collection Date | Submitters                                                                                                                      |
|--------|------------|--------------|------------------|-----------------|---------------------------------------------------------------------------------------------------------------------------------|
|        |            |              |                  |                 | Binnendijk,R.S., Boot,H.J., Zaaijer,H.L., Molenaar-de Backer,M.W.A., van Swieten,P.                                             |
| 64     | JN211127.1 | 2012-08-14   |                  | 2003-04         | Molenaar-de Backer,M.W., Lukashov,V.V., van Binnendijk,R.S., Boot,H.J., Zaaijer,H.L., Molenaar-de Backer,M.W.A., van Swieten,P. |
| 65     | JN211154.1 | 2012-08-14   |                  | 2003-04         | Molenaar-de Backer,M.W., Lukashov,V.V., van Binnendijk,R.S., Boot,H.J., Zaaijer,H.L., Molenaar-de Backer,M.W.A., van Swieten,P. |
| 66     | JN211155.1 | 2012-08-14   |                  | 2003-04         | Molenaar-de Backer,M.W., Lukashov,V.V., van Binnendijk,R.S., Boot,H.J., Zaaijer,H.L., Molenaar-de Backer,M.W.A., van Swieten,P. |
| 67     | JN211157.1 | 2012-08-14   |                  | 2003-04         | Molenaar-de Backer,M.W., Lukashov,V.V., van Binnendijk,R.S., Boot,H.J., Zaaijer,H.L., Molenaar-de Backer,M.W.A., van Swieten,P. |
| 68     | JN211185.1 | 2012-08-14   |                  | 2003-04         | Molenaar-de Backer,M.W., Lukashov,V.V., van Binnendijk,R.S., Boot,H.J., Zaaijer,H.L., Molenaar-de Backer,M.W.A., van Swieten,P. |
| 69     | JN211167.1 | 2012-08-14   |                  | 2003-05         | Molenaar-de Backer,M.W., Lukashov,V.V., van Binnendijk,R.S., Boot,H.J., Zaaijer,H.L., Molenaar-de Backer,M.W.A., van Swieten,P. |
| 70     | JN211170.1 | 2012-08-14   |                  | 2003-05         | Molenaar-de Backer,M.W., Lukashov,V.V., van Binnendijk,R.S., Boot,H.J., Zaaijer,H.L., Molenaar-de Backer,M.W.A., van Swieten,P. |
| 71     | JN211130.1 | 2012-08-14   |                  | 2003-07         | Molenaar-de Backer,M.W., Lukashov,V.V., van Binnendijk,R.S., Boot,H.J., Zaaijer,H.L., Molenaar-de Backer,M.W.A., van Swieten,P. |
| 72     | JN211163.1 | 2012-08-14   |                  | 2003-07         | Molenaar-de Backer,M.W., Lukashov,V.V., van Binnendijk,R.S., Boot,H.J., Zaaijer,H.L., Molenaar-de Backer,M.W.A., van Swieten,P. |
| 73     | JN211180.1 | 2012-08-14   |                  | 2003-08         | Molenaar-de Backer,M.W., Lukashov,V.V., van Binnendijk,R.S., Boot,H.J., Zaaijer,H.L., Molenaar-de Backer,M.W.A., van Swieten,P. |
| 74     | JN211138.1 | 2012-08-14   |                  | 2003-12         | Molenaar-de Backer,M.W., Lukashov,V.V., van Binnendijk,R.S., Boot,H.J., Zaaijer,H.L., Molenaar-de Backer,M.W.A., van Swieten,P. |
| 75     | JN211139.1 | 2012-08-14   |                  | 2003-12         | Molenaar-de Backer,M.W., Lukashov,V.V., van Binnendijk,R.S., Boot,H.J., Zaaijer,H.L., Molenaar-de Backer,M.W.A., van Swieten,P. |
| 76     | JN211183.1 | 2012-08-14   |                  | 2003-12         | Molenaar-de Backer,M.W., Lukashov,V.V., van Binnendijk,R.S., Boot,H.J., Zaaijer,H.L., Molenaar-de Backer,M.W.A., van Swieten,P. |
| 77     | JN211129.1 | 2012-08-14   |                  | 2004-01         | Molenaar-de Backer,M.W., Lukashov,V.V., van Binnendijk,R.S., Boot,H.J., Zaaijer,H.L., Molenaar-de Backer,M.W.A., van Swieten,P. |
| 78     | JN211181.1 | 2012-08-14   |                  | 2004-01         | Molenaar-de Backer,M.W., Lukashov,V.V., van Binnendijk,R.S., Boot,H.J., Zaaijer,H.L., Molenaar-de Backer,M.W.A., van Swieten,P. |
| 79     | JN211144.1 | 2012-08-14   |                  | 2004-02         | Molenaar-de Backer,M.W., Lukashov,V.V., van Binnendijk,R.S., Boot,H.J., Zaaijer,H.L., Molenaar-de Backer,M.W.A., van Swieten,P. |
| 80     | JN211150.1 | 2012-08-14   |                  | 2004-03         | Molenaar-de Backer,M.W., Lukashov,V.V., van Binnendijk,R.S., Boot,H.J., Zaaijer,H.L., Molenaar-de Backer,M.W.A., van Swieten,P. |

| <b>Sr. No</b> | <b>Accession</b> | <b>Release Date</b> | <b>Isolation Source</b> | <b>Collection Date</b> | <b>Submitters</b>                                                                                                               |
|---------------|------------------|---------------------|-------------------------|------------------------|---------------------------------------------------------------------------------------------------------------------------------|
| 81            | JN211123.1       | 2012-08-14          |                         | 2004-04                | Molenaar-de Backer,M.W., Lukashov,V.V., van Binnendijk,R.S., Boot,H.J., Zaaijer,H.L., Molenaar-de Backer,M.W.A., van Swieten,P. |
| 82            | JN211151.1       | 2012-08-14          |                         | 2004-04                | Molenaar-de Backer,M.W., Lukashov,V.V., van Binnendijk,R.S., Boot,H.J., Zaaijer,H.L., Molenaar-de Backer,M.W.A., van Swieten,P. |
| 83            | JN211184.1       | 2012-08-14          |                         | 2004-04                | Molenaar-de Backer,M.W., Lukashov,V.V., van Binnendijk,R.S., Boot,H.J., Zaaijer,H.L., Molenaar-de Backer,M.W.A., van Swieten,P. |
| 84            | JN211153.1       | 2012-08-14          |                         | 2004-06                | Molenaar-de Backer,M.W., Lukashov,V.V., van Binnendijk,R.S., Boot,H.J., Zaaijer,H.L., Molenaar-de Backer,M.W.A., van Swieten,P. |
| 85            | JN211182.1       | 2012-08-14          |                         | 2004-06                | Molenaar-de Backer,M.W., Lukashov,V.V., van Binnendijk,R.S., Boot,H.J., Zaaijer,H.L., Molenaar-de Backer,M.W.A., van Swieten,P. |
| 86            | JN211134.1       | 2012-08-14          |                         | 2004-07                | Molenaar-de Backer,M.W., Lukashov,V.V., van Binnendijk,R.S., Boot,H.J., Zaaijer,H.L., Molenaar-de Backer,M.W.A., van Swieten,P. |
| 87            | JN211176.1       | 2012-08-14          |                         | 2004-07                | Molenaar-de Backer,M.W., Lukashov,V.V., van Binnendijk,R.S., Boot,H.J., Zaaijer,H.L., Molenaar-de Backer,M.W.A., van Swieten,P. |
| 88            | JN211160.1       | 2012-08-14          |                         | 2004-09                | Molenaar-de Backer,M.W., Lukashov,V.V., van Binnendijk,R.S., Boot,H.J., Zaaijer,H.L., Molenaar-de Backer,M.W.A., van Swieten,P. |
| 89            | JN211162.1       | 2012-08-14          |                         | 2004-10                | Molenaar-de Backer,M.W., Lukashov,V.V., van Binnendijk,R.S., Boot,H.J., Zaaijer,H.L., Molenaar-de Backer,M.W.A., van Swieten,P. |
| 90            | JN211149.1       | 2012-08-14          |                         | 2004-11                | Molenaar-de Backer,M.W., Lukashov,V.V., van Binnendijk,R.S., Boot,H.J., Zaaijer,H.L., Molenaar-de Backer,M.W.A., van Swieten,P. |
| 91            | JN211177.1       | 2012-08-14          |                         | 2004-12                | Molenaar-de Backer,M.W., Lukashov,V.V., van Binnendijk,R.S., Boot,H.J., Zaaijer,H.L., Molenaar-de Backer,M.W.A., van Swieten,P. |
| 92            | JN211121.1       | 2012-08-14          |                         | 2006-01                | Molenaar-de Backer,M.W., Lukashov,V.V., van Binnendijk,R.S., Boot,H.J., Zaaijer,H.L., Molenaar-de Backer,M.W.A., van Swieten,P. |
| 93            | JN211131.1       | 2012-08-14          |                         | 2006-02                | Molenaar-de Backer,M.W., Lukashov,V.V., van Binnendijk,R.S., Boot,H.J., Zaaijer,H.L., Molenaar-de Backer,M.W.A., van Swieten,P. |
| 94            | JN211132.1       | 2012-08-14          |                         | 2006-02                | Molenaar-de Backer,M.W., Lukashov,V.V., van Binnendijk,R.S., Boot,H.J., Zaaijer,H.L., Molenaar-de Backer,M.W.A., van Swieten,P. |
| 95            | JN211128.1       | 2012-08-14          |                         | 2006-03                | Molenaar-de Backer,M.W., Lukashov,V.V., van Binnendijk,R.S., Boot,H.J., Zaaijer,H.L., Molenaar-de Backer,M.W.A., van Swieten,P. |
| 96            | JN211145.1       | 2012-08-14          |                         | 2006-03                | Molenaar-de Backer,M.W., Lukashov,V.V., van Binnendijk,R.S., Boot,H.J., Zaaijer,H.L., Molenaar-de Backer,M.W.A., van Swieten,P. |
| 97            | JN211169.1       | 2012-08-14          |                         | 2006-03                | Molenaar-de Backer,M.W., Lukashov,V.V., van Binnendijk,R.S., Boot,H.J., Zaaijer,H.L., Molenaar-de Backer,M.W.A., van Swieten,P. |
| 98            | JN211143.1       | 2012-08-14          |                         | 2006-04                | Molenaar-de Backer,M.W., Lukashov,V.V., van Binnendijk,R.S., Boot,H.J., Zaaijer,H.L.,                                           |

| Sr. No | Accession  | Release Date | Isolation Source | Collection Date | Submitters                                                                                                                      |
|--------|------------|--------------|------------------|-----------------|---------------------------------------------------------------------------------------------------------------------------------|
|        |            |              |                  |                 | Molenaar-de Backer,M.W.A., van Swieten,P.                                                                                       |
| 99     | JN211166.1 | 2012-08-14   |                  | 2006-04         | Molenaar-de Backer,M.W., Lukashov,V.V., van Binnendijk,R.S., Boot,H.J., Zaaijer,H.L., Molenaar-de Backer,M.W.A., van Swieten,P. |
| 100    | JN211164.1 | 2012-08-14   |                  | 2006-05         | Molenaar-de Backer,M.W., Lukashov,V.V., van Binnendijk,R.S., Boot,H.J., Zaaijer,H.L., Molenaar-de Backer,M.W.A., van Swieten,P. |
| 101    | JN211141.1 | 2012-08-14   |                  | 2006-06         | Molenaar-de Backer,M.W., Lukashov,V.V., van Binnendijk,R.S., Boot,H.J., Zaaijer,H.L., Molenaar-de Backer,M.W.A., van Swieten,P. |
| 102    | JN211147.1 | 2012-08-14   |                  | 2006-06         | Molenaar-de Backer,M.W., Lukashov,V.V., van Binnendijk,R.S., Boot,H.J., Zaaijer,H.L., Molenaar-de Backer,M.W.A., van Swieten,P. |
| 103    | JN211161.1 | 2012-08-14   |                  | 2006-07         | Molenaar-de Backer,M.W., Lukashov,V.V., van Binnendijk,R.S., Boot,H.J., Zaaijer,H.L., Molenaar-de Backer,M.W.A., van Swieten,P. |
| 104    | JN211179.1 | 2012-08-14   |                  | 2006-07         | Molenaar-de Backer,M.W., Lukashov,V.V., van Binnendijk,R.S., Boot,H.J., Zaaijer,H.L., Molenaar-de Backer,M.W.A., van Swieten,P. |
| 105    | JN211173.1 | 2012-08-14   |                  | 2006-09         | Molenaar-de Backer,M.W., Lukashov,V.V., van Binnendijk,R.S., Boot,H.J., Zaaijer,H.L., Molenaar-de Backer,M.W.A., van Swieten,P. |
| 106    | FJ265736.1 | 2008-10-28   |                  | 2007-02         | Rinckel,L.A., Buno,B.R., Gierman,T.M., Lee,D.C.                                                                                 |
| 107    | JN211148.1 | 2012-08-14   |                  | 2008-05         | Molenaar-de Backer,M.W., Lukashov,V.V., van Binnendijk,R.S., Boot,H.J., Zaaijer,H.L., Molenaar-de Backer,M.W.A., van Swieten,P. |
| 108    | JN211136.1 | 2012-08-14   |                  | 2008-06         | Molenaar-de Backer,M.W., Lukashov,V.V., van Binnendijk,R.S., Boot,H.J., Zaaijer,H.L., Molenaar-de Backer,M.W.A., van Swieten,P. |
| 109    | JN211168.1 | 2012-08-14   |                  | 2008-06         | Molenaar-de Backer,M.W., Lukashov,V.V., van Binnendijk,R.S., Boot,H.J., Zaaijer,H.L., Molenaar-de Backer,M.W.A., van Swieten,P. |
| 110    | JN211135.1 | 2012-08-14   |                  | 2008-07         | Molenaar-de Backer,M.W., Lukashov,V.V., van Binnendijk,R.S., Boot,H.J., Zaaijer,H.L., Molenaar-de Backer,M.W.A., van Swieten,P. |
| 111    | JN211175.1 | 2012-08-14   |                  | 2008-07         | Molenaar-de Backer,M.W., Lukashov,V.V., van Binnendijk,R.S., Boot,H.J., Zaaijer,H.L., Molenaar-de Backer,M.W.A., van Swieten,P. |
| 112    | JN211178.1 | 2012-08-14   |                  | 2008-10         | Molenaar-de Backer,M.W., Lukashov,V.V., van Binnendijk,R.S., Boot,H.J., Zaaijer,H.L., Molenaar-de Backer,M.W.A., van Swieten,P. |
| 113    | JN211171.1 | 2012-08-14   |                  | 2008-12         | Molenaar-de Backer,M.W., Lukashov,V.V., van Binnendijk,R.S., Boot,H.J., Zaaijer,H.L., Molenaar-de Backer,M.W.A., van Swieten,P. |
| 114    | JN211172.1 | 2012-08-14   |                  | 2008-12         | Molenaar-de Backer,M.W., Lukashov,V.V., van Binnendijk,R.S., Boot,H.J., Zaaijer,H.L., Molenaar-de Backer,M.W.A., van Swieten,P. |
| 115    | JN211124.1 | 2012-08-14   |                  | 2009-01         | Molenaar-de Backer,M.W., Lukashov,V.V., van Binnendijk,R.S., Boot,H.J., Zaaijer,H.L., Molenaar-de Backer,M.W.A., van Swieten,P. |
| 116    | JN211122.1 | 2012-08-14   |                  | 2009-02         | Molenaar-de Backer,M.W., Lukashov,V.V., van Binnendijk,R.S., Boot,H.J., Zaaijer,H.L.,                                           |

| Sr. No | Accession   | Release Date | Isolation Source | Collection Date | Submitters                                                                                                                      |
|--------|-------------|--------------|------------------|-----------------|---------------------------------------------------------------------------------------------------------------------------------|
|        |             |              |                  |                 | Molenaar-de Backer,M.W.A., van Swieten,P.                                                                                       |
| 117    | JN211126.1  | 2012-08-14   |                  | 2009-02         | Molenaar-de Backer,M.W., Lukashov,V.V., van Binnendijk,R.S., Boot,H.J., Zaaijer,H.L., Molenaar-de Backer,M.W.A., van Swieten,P. |
| 118    | JN211133.1  | 2012-08-14   |                  | 2009-03         | Molenaar-de Backer,M.W., Lukashov,V.V., van Binnendijk,R.S., Boot,H.J., Zaaijer,H.L., Molenaar-de Backer,M.W.A., van Swieten,P. |
| 119    | JN211140.1  | 2012-08-14   |                  | 2009-04         | Molenaar-de Backer,M.W., Lukashov,V.V., van Binnendijk,R.S., Boot,H.J., Zaaijer,H.L., Molenaar-de Backer,M.W.A., van Swieten,P. |
| 120    | JN211142.1  | 2012-08-14   |                  | 2009-04         | Molenaar-de Backer,M.W., Lukashov,V.V., van Binnendijk,R.S., Boot,H.J., Zaaijer,H.L., Molenaar-de Backer,M.W.A., van Swieten,P. |
| 121    | JN211137.1  | 2012-08-14   |                  | 2009-05         | Molenaar-de Backer,M.W., Lukashov,V.V., van Binnendijk,R.S., Boot,H.J., Zaaijer,H.L., Molenaar-de Backer,M.W.A., van Swieten,P. |
| 122    | JN211146.1  | 2012-08-14   |                  | 2009-05         | Molenaar-de Backer,M.W., Lukashov,V.V., van Binnendijk,R.S., Boot,H.J., Zaaijer,H.L., Molenaar-de Backer,M.W.A., van Swieten,P. |
| 123    | JN211152.1  | 2012-08-14   |                  | 2009-05         | Molenaar-de Backer,M.W., Lukashov,V.V., van Binnendijk,R.S., Boot,H.J., Zaaijer,H.L., Molenaar-de Backer,M.W.A., van Swieten,P. |
| 124    | JN211156.1  | 2012-08-14   |                  | 2009-07         | Molenaar-de Backer,M.W., Lukashov,V.V., van Binnendijk,R.S., Boot,H.J., Zaaijer,H.L., Molenaar-de Backer,M.W.A., van Swieten,P. |
| 125    | JN211159.1  | 2012-08-14   |                  | 2009-07         | Molenaar-de Backer,M.W., Lukashov,V.V., van Binnendijk,R.S., Boot,H.J., Zaaijer,H.L., Molenaar-de Backer,M.W.A., van Swieten,P. |
| 126    | HQ340601.1  | 2010-11-24   | heart            | 2009-07         | Utta,F., Kandolf,R., Bock,C.T.                                                                                                  |
| 127    | HQ340602.1  | 2010-11-24   | heart            | 2009-07         | Utta,F., Kandolf,R., Bock,C.T.                                                                                                  |
| 128    | JN211158.1  | 2012-08-14   |                  | 2009-08         | Molenaar-de Backer,M.W., Lukashov,V.V., van Binnendijk,R.S., Boot,H.J., Zaaijer,H.L., Molenaar-de Backer,M.W.A., van Swieten,P. |
| 129    | JN211165.1  | 2012-08-14   |                  | 2009-08         | Molenaar-de Backer,M.W., Lukashov,V.V., van Binnendijk,R.S., Boot,H.J., Zaaijer,H.L., Molenaar-de Backer,M.W.A., van Swieten,P. |
| 130    | JN211174.1  | 2012-08-14   |                  | 2009-08         | Molenaar-de Backer,M.W., Lukashov,V.V., van Binnendijk,R.S., Boot,H.J., Zaaijer,H.L., Molenaar-de Backer,M.W.A., van Swieten,P. |
| 131    | MH151117.1  | 2018-12-24   |                  | 2017-07         | Jia,J., Zhong,Y., Zhao,X., Guo,Y., Ma,Y., Zhang,J.                                                                              |
| 132    | NC_000883.2 | 1999-08-02   |                  |                 | Zhi,N., Zadori,Z., Brown,K.E., Tijssen,P.                                                                                       |
| 133    | MP326641.1  | 2020-05-15   |                  |                 | GAO,K., LINNEN,J.M., NORTON,K.C., GORDON,P.C., DO,D., LE,T.N.                                                                   |
| 134    | MP327831.1  | 2020-05-15   |                  |                 | GAO,K., LINNEN,J.M., NORTON,K.C., GORDON,P.C., DO,D., LE,T.N.                                                                   |
| 135    | MK989716.1  | 2019-08-17   |                  |                 | Phan,M.V.T., Agoti,C.N., Nokes,D.J., Cotten,M.                                                                                  |
| 136    | MA897859.1  | 2019-07-31   |                  |                 | Le,T.N., Do,D., Gordon,P.C., Linnen,J.M., Norton,K.C., Gao,K.                                                                   |
| 137    | LP830882.1  | 2018-04-29   |                  |                 | CARRICK,J.                                                                                                                      |
| 138    | LP830895.1  | 2018-04-29   |                  |                 | CARRICK,J.                                                                                                                      |



| Sr. No | Accession  | Release Date | Isolation Source | Collection Date | Submitters                                                                                                       |
|--------|------------|--------------|------------------|-----------------|------------------------------------------------------------------------------------------------------------------|
| 139    | LZ247063.1 | 2018-02-28   |                  |                 | Le,T.N., Gao,K., Linnen,J.M., Norton,K.C., Gordon,P.C., Do,D.                                                    |
| 140    | KX752821.1 | 2017-08-19   |                  |                 | Fryer,J.F., Fritzsche,M., Holmes,N., Nordgren,A.                                                                 |
| 141    | LX096830.1 | 2017-07-29   |                  |                 | Kaneko,A., Ran,G., Aoyagi,K.                                                                                     |
| 142    | MS987313.1 | 2017-07-12   |                  |                 | CARRICK,J.                                                                                                       |
| 143    | MS987326.1 | 2017-07-12   |                  |                 | CARRICK,J.                                                                                                       |
| 144    | LQ249377.1 | 2016-10-05   |                  |                 | GAO,K., LINNEN,J., NORTON,K.C., DAT,D., LE,T.N., GORDON,P.                                                       |
| 145    | LN680968.2 | 2016-02-01   |                  |                 | Ivanova,S.K., Mihneva,Z.G., Toshev,A.K., Kovaleva,V.P., Andonova,L.G., Muller,C.P., Huebschen,J.M., Huebschen,J. |
| 146    | HW766536.1 | 2015-02-24   |                  |                 | Gordon,P.C., Le,T.N., Gao,K., Linnen,J.M., Do,D., Norton,K.C.                                                    |
| 147    | KM065414.1 | 2014-08-26   | blood            |                 | Trosemeier,J.H., Branting,A., Lukashov,V.V., Blumel,J., Baylis,S.A., Bluemel,J., Troeseimer,J.-H.                |
| 148    | KM065415.1 | 2014-08-26   | blood            |                 | Trosemeier,J.H., Branting,A., Lukashov,V.V., Blumel,J., Baylis,S.A., Bluemel,J., Troeseimer,J.-H.                |
| 149    | JB292192.1 | 2013-09-25   |                  |                 | HEWITT,C., SAMULSKI,R.J.                                                                                         |
| 150    | JB151806.1 | 2013-04-25   |                  |                 | CARRICK,J.M.                                                                                                     |
| 151    | JB151819.1 | 2013-04-25   |                  |                 | CARRICK,J.M.                                                                                                     |
| 152    | JA829545.1 | 2013-01-29   |                  |                 | GAO,K., LINNEN,J.M., NORTON,K.C., GORDON,P.C., DO,D., LE,T.N.                                                    |
| 153    | FW377125.1 | 2010-09-30   |                  |                 | Rinkeru,L.A., Buno,B., Bimusu,B., Glenn,C., Giaman,T.M., Lee,D.C.                                                |
| 154    | FW377252.1 | 2010-09-30   |                  |                 | Rinkeru,L.A., Buno,B., Bimusu,B., Glenn,C., Giaman,T.M., Lee,D.C.                                                |
| 155    | FW377253.1 | 2010-09-30   |                  |                 | Rinkeru,L.A., Buno,B., Bimusu,B., Glenn,C., Giaman,T.M., Lee,D.C.                                                |
| 156    | FW377254.1 | 2010-09-30   |                  |                 | Rinkeru,L.A., Buno,B., Bimusu,B., Glenn,C., Giaman,T.M., Lee,D.C.                                                |
| 157    | FW377255.1 | 2010-09-30   |                  |                 | Rinkeru,L.A., Buno,B., Bimusu,B., Glenn,C., Giaman,T.M., Lee,D.C.                                                |
| 158    | FW377256.1 | 2010-09-30   |                  |                 | Rinkeru,L.A., Buno,B., Bimusu,B., Glenn,C., Giaman,T.M., Lee,D.C.                                                |
| 159    | FW377257.1 | 2010-09-30   |                  |                 | Rinkeru,L.A., Buno,B., Bimusu,B., Glenn,C., Giaman,T.M., Lee,D.C.                                                |
| 160    | FN669502.1 | 2010-05-20   |                  |                 | Dina,J., Villedieu,F., Labombarda,F., Freymuth,F., de la Gastine,G., Jokic,M., Vabret,A.                         |
| 161    | FN669503.1 | 2010-05-20   |                  |                 | Dina,J., Villedieu,F., Labombarda,F., Freymuth,F., de la Gastine,G., Jokic,M., Vabret,A.                         |
| 162    | FN669504.1 | 2010-05-20   |                  |                 | Dina,J., Villedieu,F., Labombarda,F., Freymuth,F., de la Gastine,G., Jokic,M., Vabret,A.                         |
| 163    | FN669505.1 | 2010-05-20   | blood            |                 | Dina,J., Villedieu,F., Labombarda,F., Freymuth,F., de la Gastine,G., Jokic,M., Vabret,A.                         |

| Sr. No | Accession  | Release Date | Isolation Source | Collection Date | Submitters                                                                                                                                  |
|--------|------------|--------------|------------------|-----------------|---------------------------------------------------------------------------------------------------------------------------------------------|
| 164    | FN669506.1 | 2010-05-20   |                  |                 | Dina,J., Villedieu,F., Labombarda,F., Freymuth,F., de la Gastine,G., Jokic,M., Vabret,A.                                                    |
| 165    | FN669507.1 | 2010-05-20   |                  |                 | Dina,J., Villedieu,F., Labombarda,F., Freymuth,F., de la Gastine,G., Jokic,M., Vabret,A.                                                    |
| 166    | FV537070.1 | 2010-03-18   |                  |                 | Millar,D.S., Meruki,J.R.                                                                                                                    |
| 167    | FV537071.1 | 2010-03-18   |                  |                 | Millar,D.S., Meruki,J.R.                                                                                                                    |
| 168    | FV537072.1 | 2010-03-18   |                  |                 | Millar,D.S., Meruki,J.R.                                                                                                                    |
| 169    | FV537073.1 | 2010-03-18   |                  |                 | Millar,D.S., Meruki,J.R.                                                                                                                    |
| 170    | AB550331.1 | 2010-03-13   |                  |                 | Tsujikawa,M., Nishigaki,H., Yoshikawa,M., Kubo,J.A., Shimamura,Y., Urayama,T., Hattori,S., Yunoki,M., Ikuta,K.                              |
| 171    | FN598218.1 | 2009-12-01   |                  |                 | Op de Beeck,A., Caillet-Fauquet,P., Baurin,S., Laub,R.                                                                                      |
| 172    | GM703832.1 | 2008-12-19   |                  |                 | Lee,D.C., Gierman,T.M., Glenn,C., Beames,B., Buno,B., Rinckel,L.A.                                                                          |
| 173    | GM703959.1 | 2008-12-19   |                  |                 | Lee,D.C., Gierman,T.M., Glenn,C., Beames,B., Buno,B., Rinckel,L.A.                                                                          |
| 174    | GM703960.1 | 2008-12-19   |                  |                 | Lee,D.C., Gierman,T.M., Glenn,C., Beames,B., Buno,B., Rinckel,L.A.                                                                          |
| 175    | GM703961.1 | 2008-12-19   |                  |                 | Lee,D.C., Gierman,T.M., Glenn,C., Beames,B., Buno,B., Rinckel,L.A.                                                                          |
| 176    | GM703962.1 | 2008-12-19   |                  |                 | Lee,D.C., Gierman,T.M., Glenn,C., Beames,B., Buno,B., Rinckel,L.A.                                                                          |
| 177    | GM703963.1 | 2008-12-19   |                  |                 | Lee,D.C., Gierman,T.M., Glenn,C., Beames,B., Buno,B., Rinckel,L.A.                                                                          |
| 178    | GM703964.1 | 2008-12-19   |                  |                 | Lee,D.C., Gierman,T.M., Glenn,C., Beames,B., Buno,B., Rinckel,L.A.                                                                          |
| 179    | FB715682.1 | 2008-11-19   |                  |                 | Wong,S., Young,N.S., Zhi,N., Brown,K.                                                                                                       |
| 180    | FB715683.1 | 2008-11-19   |                  |                 | Wong,S., Young,N.S., Zhi,N., Brown,K.                                                                                                       |
| 181    | EF216869.1 | 2007-02-14   | blood            |                 | Baylis,S.A.                                                                                                                                 |
| 182    | DQ408301.1 | 2006-03-12   |                  |                 | Schneider,B., Hone,A., Tolba,R.H., Fischer,H.P., Blumel,J., Eis-Hubinger,A.M.                                                               |
| 183    | DQ408302.1 | 2006-03-12   |                  |                 | Schneider,B., Hone,A., Tolba,R.H., Fischer,H.P., Blumel,J., Eis-Hubinger,A.M.                                                               |
| 184    | DQ408303.1 | 2006-03-12   |                  |                 | Schneider,B., Hone,A., Tolba,R.H., Fischer,H.P., Blumel,J., Eis-Hubinger,A.M.                                                               |
| 185    | DQ408304.1 | 2006-03-12   |                  |                 | Schneider,B., Hone,A., Tolba,R.H., Fischer,H.P., Blumel,J., Eis-Hubinger,A.M.                                                               |
| 186    | DQ408305.1 | 2006-03-12   |                  |                 | Schneider,B., Hone,A., Tolba,R.H., Fischer,H.P., Blumel,J., Eis-Hubinger,A.M.                                                               |
| 187    | DQ357064.1 | 2006-02-05   |                  |                 | Toan,N.L., Duechting,A., Kremsner,P.G., Song,L.H., Ebinger,M., Aberle,S., Binh,V.Q., Duy,D.N., Torresi,J., Kandolf,R., Bock,C.T., Bock,T.C. |
| 188    | DQ357065.1 | 2006-02-05   |                  |                 | Toan,N.L., Duechting,A., Kremsner,P.G., Song,L.H., Ebinger,M., Aberle,S., Binh,V.Q., Duy,D.N., Torresi,J., Kandolf,R., Bock,C.T., Bock,T.C. |
| 189    | DQ333426.1 | 2006-01-08   |                  |                 | Schneider,B., Hone,A., Tolba,R.H.,                                                                                                          |

| Sr. No | Accession  | Release Date | Isolation Source | Collection Date | Submitters                                                                                                                                                        |
|--------|------------|--------------|------------------|-----------------|-------------------------------------------------------------------------------------------------------------------------------------------------------------------|
|        |            |              |                  |                 | Fischer,H.P., Blumel,J., Eis-Hubinger,A.M.                                                                                                                        |
| 190    | DQ333427.1 | 2006-01-08   |                  |                 | Schneider,B., Hone,A., Tolba,R.H., Fischer,H.P., Blumel,J., Eis-Hubinger,A.M.                                                                                     |
| 191    | DQ333428.1 | 2006-01-08   |                  |                 | Schneider,B., Hone,A., Tolba,R.H., Fischer,H.P., Blumel,J., Eis-Hubinger,A.M.                                                                                     |
| 192    | DQ293995.2 | 2005-12-11   | blood            |                 | Parsyan,A., Kerr,S., Owusu-Ofori,S., Elliott,G., Allain,J.P., Parsyan,A.E., Thomas,I., Laub,R., Allain,J.-P., Szmaragd,C., Candotti,D.                            |
| 193    | DQ234769.2 | 2005-11-02   | blood            |                 | Parsyan,A., Kerr,S., Owusu-Ofori,S., Elliott,G., Allain,J.P., Szmaragd,C., Candotti,D., Parsyan,A.E., Addo-Yobo,E., Akpene,H., Sarkodie,F., Allain,J.-P.          |
| 194    | DQ234771.2 | 2005-11-02   | blood            |                 | Parsyan,A., Kerr,S., Owusu-Ofori,S., Elliott,G., Allain,J.P., Szmaragd,C., Candotti,D., Parsyan,A.E., Addo-Yobo,E., Akpene,H., Sarkodie,F., Allain,J.-P.          |
| 195    | DQ234775.2 | 2005-11-02   | blood            |                 | Parsyan,A., Szmaragd,C., Allain,J.P., Candotti,D., Parsyan,A.E., Addo-Yobo,E., Owusu-Ofori,S., Akpene,H., Sarkodie,F., Allain,J.-P.                               |
| 196    | DQ234778.2 | 2005-11-02   | blood            |                 | Parsyan,A., Kerr,S., Owusu-Ofori,S., Elliott,G., Allain,J.P., Szmaragd,C., Candotti,D., Parsyan,A.E., Addo-Yobo,E., Akpene,H., Sarkodie,F., Allain,J.-P.          |
| 197    | DQ234779.2 | 2005-11-02   | blood            |                 | Parsyan,A., Kerr,S., Owusu-Ofori,S., Elliott,G., Allain,J.P., Szmaragd,C., Candotti,D., Parsyan,A.E., Addo-Yobo,E., Akpene,H., Sarkodie,F., Allain,J.-P.          |
| 198    | DQ225148.1 | 2005-10-26   |                  |                 | Toan,N.L., Duechting,A., Kreamsner,P.G., Song,L.H., Ebinger,M., Aberle,S., Binh,V.Q., Duy,D.N., Torresi,J., Kandolf,R., Bock,C.T., Kaiser,H., Klingel,K., Bock,T. |
| 199    | DQ225149.1 | 2005-10-26   |                  |                 | Toan,N.L., Duechting,A., Kreamsner,P.G., Song,L.H., Ebinger,M., Aberle,S., Binh,V.Q., Duy,D.N., Torresi,J., Kandolf,R., Bock,C.T., Kaiser,H., Klingel,K., Bock,T. |
| 200    | DQ225150.1 | 2005-10-26   |                  |                 | Toan,N.L., Duechting,A., Kreamsner,P.G., Song,L.H., Ebinger,M., Aberle,S., Binh,V.Q., Duy,D.N., Torresi,J., Kandolf,R., Bock,C.T., Kaiser,H., Klingel,K., Bock,T. |
| 201    | DQ225151.1 | 2005-10-26   |                  |                 | Toan,N.L., Duechting,A., Kreamsner,P.G., Song,L.H., Ebinger,M., Aberle,S., Binh,V.Q., Duy,D.N., Torresi,J., Kandolf,R., Bock,C.T., Kaiser,H., Klingel,K., Bock,T. |
| 202    | AY903437.2 | 2005-10-01   |                  |                 | Blumel,J., Eis-Hubinger,A.M., Stuhler,A., Bonsch,C., Gessner,M., Lower,J.                                                                                         |
| 203    | AY647977.1 | 2004-07-07   | blood            |                 | Keller,L.W., Barbosa,M.L., Durigon,E.L.                                                                                                                           |
| 204    | AJ781031.1 | 2004-07-01   |                  |                 | Plentz,A., Hahn,J., Holler,E., Jilg,W., Modrow,S.                                                                                                                 |
| 205    | AJ781032.1 | 2004-07-01   |                  |                 | Plentz,A., Hahn,J., Holler,E., Jilg,W., Modrow,S.                                                                                                                 |
| 206    | AJ781033.1 | 2004-07-01   |                  |                 | Plentz,A., Hahn,J., Holler,E., Jilg,W.,                                                                                                                           |

| Sr. No | Accession  | Release Date | Isolation Source | Collection Date | Submitters                                                                                                                                                                                                                                                         |
|--------|------------|--------------|------------------|-----------------|--------------------------------------------------------------------------------------------------------------------------------------------------------------------------------------------------------------------------------------------------------------------|
|        |            |              |                  |                 | Modrow,S.                                                                                                                                                                                                                                                          |
| 207    | AJ781034.1 | 2004-07-01   |                  |                 | Plentz,A., Hahn,J., Holler,E., Jilg,W., Modrow,S.                                                                                                                                                                                                                  |
| 208    | AJ781035.1 | 2004-07-01   |                  |                 | Plentz,A., Hahn,J., Holler,E., Jilg,W., Modrow,S.                                                                                                                                                                                                                  |
| 209    | AJ781036.1 | 2004-07-01   |                  |                 | Plentz,A., Hahn,J., Holler,E., Jilg,W., Modrow,S.                                                                                                                                                                                                                  |
| 210    | AJ781037.1 | 2004-07-01   |                  |                 | Plentz,A., Hahn,J., Holler,E., Jilg,W., Modrow,S.                                                                                                                                                                                                                  |
| 211    | AJ781038.1 | 2004-07-01   |                  |                 | Plentz,A., Hahn,J., Holler,E., Jilg,W., Modrow,S.                                                                                                                                                                                                                  |
| 212    | AJ717293.1 | 2004-05-26   | blood            |                 | Liefeldt,L., Plentz,A., Raab,U., Klempa,B., Kershaw,O., Endres,A.S., Neumayer,H.H., Meisel,H., Modrow,S.                                                                                                                                                           |
| 213    | AY582124.2 | 2004-04-11   |                  |                 | Parsyan,A., Kerr,S., Owusu-Ofori,S., Elliott,G., Allain,J.P., Szmaragd,C., Allain,J.-P., Candotti,D., Parsyan,A.E.                                                                                                                                                 |
| 214    | AY582125.2 | 2004-04-11   |                  |                 | Parsyan,A., Kerr,S., Owusu-Ofori,S., Elliott,G., Allain,J.P., Szmaragd,C., Allain,J.-P., Candotti,D., Parsyan,A.E.                                                                                                                                                 |
| 215    | AY504945.1 | 2004-01-21   |                  |                 | Norja,P., Hokynar,K., Aaltonen,L.M., Chen,R., Ranki,A., Partio,E.K., Kiviluoto,O., Davidkin,I., Leivo,T., Eis-Hubinger,A.M., Schneider,B., Fischer,H.P., Tolba,R., Vapalahti,O., Vaheri,A., Soderlund-Venermo,M., Hedman,K., Kakkola,L.M., Hedman,K.P., Cohen,B.J. |
| 216    | AB126262.1 | 2003-11-20   |                  |                 | Abe,K., Kiuchi,T., Tanaka,K., Edamoto,Y., Aiba,N., Sata,T.                                                                                                                                                                                                         |
| 217    | AB126263.1 | 2003-11-20   |                  |                 | Abe,K., Kiuchi,T., Tanaka,K., Edamoto,Y., Aiba,N., Sata,T.                                                                                                                                                                                                         |
| 218    | AB126264.1 | 2003-11-20   |                  |                 | Abe,K., Kiuchi,T., Tanaka,K., Edamoto,Y., Aiba,N., Sata,T.                                                                                                                                                                                                         |
| 219    | AB126265.1 | 2003-11-20   |                  |                 | Abe,K., Kiuchi,T., Tanaka,K., Edamoto,Y., Aiba,N., Sata,T.                                                                                                                                                                                                         |
| 220    | AB126266.1 | 2003-11-20   |                  |                 | Abe,K., Kiuchi,T., Tanaka,K., Edamoto,Y., Aiba,N., Sata,T.                                                                                                                                                                                                         |
| 221    | AB126267.1 | 2003-11-20   |                  |                 | Abe,K., Kiuchi,T., Tanaka,K., Edamoto,Y., Aiba,N., Sata,T.                                                                                                                                                                                                         |
| 222    | AB126268.1 | 2003-11-20   |                  |                 | Abe,K., Kiuchi,T., Tanaka,K., Edamoto,Y., Aiba,N., Sata,T.                                                                                                                                                                                                         |
| 223    | AB126269.1 | 2003-11-20   |                  |                 | Abe,K., Kiuchi,T., Tanaka,K., Edamoto,Y., Aiba,N., Sata,T.                                                                                                                                                                                                         |
| 224    | AB126270.1 | 2003-11-20   |                  |                 | Abe,K., Kiuchi,T., Tanaka,K., Edamoto,Y., Aiba,N., Sata,T.                                                                                                                                                                                                         |
| 225    | AB126271.1 | 2003-11-20   |                  |                 | Abe,K., Kiuchi,T., Tanaka,K., Edamoto,Y., Aiba,N., Sata,T.                                                                                                                                                                                                         |
| 226    | AY386330.1 | 2003-10-08   |                  |                 | Zhi,N., Zadori,Z., Brown,K.E., Tijssen,P.                                                                                                                                                                                                                          |
| 227    | AY083234.1 | 2002-08-28   |                  |                 | Servant,A., Laperche,S., Lallemand,F., Marinho,V., De Saint Maur,G., Meritet,J.F., Garbarg-Chenon,A., Marhino,V.                                                                                                                                                   |
| 228    | AY064475.1 | 2002-05-23   |                  |                 | Nguyen,Q.T., Wong,S., Heegaard,E.D.,                                                                                                                                                                                                                               |

| Sr. No | Accession  | Release Date | Isolation Source | Collection Date | Submitters                                                                                                                                                                                      |
|--------|------------|--------------|------------------|-----------------|-------------------------------------------------------------------------------------------------------------------------------------------------------------------------------------------------|
|        |            |              |                  |                 | Brown,K.E.                                                                                                                                                                                      |
| 229    | AY064476.1 | 2002-05-23   |                  |                 | Nguyen,Q.T., Wong,S., Heegaard,E.D., Brown,K.E.                                                                                                                                                 |
| 230    | AY044266.2 | 2001-09-02   |                  |                 | Hokynar,K., Soderlund-Venermo,M., Pesonen,M., Ranki,A., Kiviluoto,O., Partio,E.K., Hedman,K.                                                                                                    |
| 231    | AY028237.1 | 2001-04-14   |                  |                 | Tolfvenstam,T., Norbeck,O., Brytting,M., Hemauer,A., Modrow,S., Broliden,K.                                                                                                                     |
| 232    | AX003421.1 | 2000-08-24   |                  |                 | Auguste,V., Garbarg-Chenon,A., Nguyen,Q.T.                                                                                                                                                      |
| 233    | AB030673.1 | 2000-01-26   |                  |                 | Umene,K., Nunoue,T., Takasawa,N., Munakata,Y., Ishii,K.K., Takahashi,Y., Takahashi,M., Fu,Y., Ishii,T., Fujii,H., Saito,T., Takano,H., Noda,T., Suzuki,M., Nose,M., Zolla-Patzner,S., Sasaki,T. |
| 234    | AB030693.1 | 2000-01-26   |                  |                 | Ishii,K.K., Munakata,Y., Funato,T., Fu,Y., Koseki,N., Sugamura,K., Sasaki,T.                                                                                                                    |
| 235    | AB030694.1 | 2000-01-26   |                  |                 | Takasawa,N., Munakata,Y., Ishii,K.K., Takahashi,Y., Takahashi,M., Fu,Y., Ishii,T., Fujii,H., Saito,T., Takano,H., Noda,T., Suzuki,M., Nose,M., Zolla-Patzner,S., Sasaki,T.                      |
| 236    | AF162273.1 | 1999-08-02   |                  |                 | Gallinella,G., Venturoli,S.                                                                                                                                                                     |
| 237    | AF161223.1 | 1999-07-29   |                  |                 | Hokynar,K., Brunstein,J., Soderlund-Venermo,M., Kiviluoto,O., Partio,E.K., Kontinen,Y., Hedman,K., Brunstein,J.D.                                                                               |
| 238    | AF161224.1 | 1999-07-29   |                  |                 | Hokynar,K., Brunstein,J., Soderlund-Venermo,M., Kiviluoto,O., Partio,E.K., Kontinen,Y., Hedman,K., Brunstein,J.D.                                                                               |
| 239    | AF161225.1 | 1999-07-29   |                  |                 | Hokynar,K., Brunstein,J., Soderlund-Venermo,M., Kiviluoto,O., Partio,E.K., Kontinen,Y., Hedman,K., Brunstein,J.D.                                                                               |
| 240    | AF161226.1 | 1999-07-29   |                  |                 | Hokynar,K., Brunstein,J., Soderlund-Venermo,M., Kiviluoto,O., Partio,E.K., Kontinen,Y., Hedman,K., Brunstein,J.D.                                                                               |
| 241    | AF113323.1 | 1999-01-03   |                  |                 | Hemauer,A., Beckenlehner,K., Wolf,H., Lang,B., Modrow,S.                                                                                                                                        |
| 242    | Z70528.1   | 1996-04-09   |                  |                 | Hemauer,A., von Poblitzki,A., Gigler,A., Cassinotti,P., Siegl,G., Wolf,H., Modrow,S.                                                                                                            |
| 243    | Z70560.1   | 1996-04-09   |                  |                 | Hemauer,A., Von Poblitzki,A., Gigler,A., Cassinotti,P., Siegl,G., Wolf,H., Modrow,S.                                                                                                            |
| 244    | Z70599.1   | 1996-04-09   |                  |                 | Hemauer,A., Von Poblitzki,A., Gigler,A., Cassinotti,P., Siegl,G., Wolf,H., Modrow,S.                                                                                                            |
| 245    | Z68146.1   | 1995-12-05   |                  |                 | Hicks,K.E., Cubel,R.C., Cohen,B.J., Clewley,J.P.                                                                                                                                                |
| 246    | M13178.1   | 1993-08-03   |                  |                 | Shade,R.O., Blundell,M.C., Cotmore,S.F., Tattersall,P., Astell,C.R.                                                                                                                             |
| 247    | M24682.1   | 1993-08-03   |                  |                 | Blundell,M.C., Beard,C., Astell,C.R.                                                                                                                                                            |

## Appendix 2: Details of cases positive for B19V by PCR

|                               | ID                               | BDN-18-005                 | BDN-18-046 | BDN-18-064 | BDN-18-195                         | BDN-18-200         | BKR-18-160 | BKR-18-188 | BKR-18-202 | BDN-17-357         | DJL-17-157 | BDN-17-344               | BDN-18-017                       | BDN-18-181 |
|-------------------------------|----------------------------------|----------------------------|------------|------------|------------------------------------|--------------------|------------|------------|------------|--------------------|------------|--------------------------|----------------------------------|------------|
| <b>Epidemiological data</b>   | Sex                              | Male                       | Female     | Male       | Female                             | Male               | Female     | Male       | Female     | Male               | Female     | Female                   | Female                           | Male       |
|                               | Age (yrs)                        | 0.4                        | 4          | 0.66       | 2                                  | 6                  | 22         | 10         | 30         | 7                  | 15         | 45                       | 5                                | 5          |
|                               | Month of admission               | January                    | February   | March      | June                               | June               | August     | September  | September  | November           | October    | November                 | January                          | May        |
|                               | Date of Illness Onset            | 2017-12-28                 | 2018-02-10 | 2018-03-14 | 2018-04-02                         | 2018-06-02         | 2018-08-17 | 2018-09-02 | 2018-08-22 | 2017-11-07         | 2017-09-18 | 2017-11-05               | 2018-01-12                       | 2018-05-10 |
|                               | District                         | Darjeeling                 | Bardhaman  | Bardhaman  | Bardhaman                          | Bardhaman          | Bankura    | Purulia    | Bankura    | Deogarh            | Darjeeling | Bardhaman                | Hooghly                          | Bardhaman  |
| <b>Clinical Presentation</b>  | Admission diagnosis              | AMES                       | AES        | AES        | Meningitis                         | Meningitis         | AES        | Menigitis  | AES        | AES                | AES        | AMES                     | AES                              | AMES       |
|                               | Fever                            | Y                          | Y          | Y          | Y                                  | Y                  | Y          | Y          | Y          | Y                  | Y          | Y                        | Y                                | Y          |
|                               | Change in Mental status          | N                          | Y          | N          | Y                                  | N                  | N          | Y          | Y          | Y                  | Y          | Y                        | Y                                | N          |
|                               | Seizure                          | Y                          | Y          | Y          | Y                                  | N                  | Y          | Y          | N          | Y                  | Y          | N                        | Y                                | N          |
|                               | Neck Rigidity                    | NA                         | Y          | NA         | Y                                  | NA                 | NA         | NA         | NA         | Y                  | NA         | Y                        | Y                                | Y          |
|                               | Drowsiness                       | NA                         | Y          | NA         | Y                                  | NA                 | NA         | NA         | NA         | Y                  | NA         | NA                       | Y                                | NA         |
|                               | Other symptoms                   | Cold, Respiratory distress |            | NA         | history of enteric fever, lethargy | headache, backache | NA         | NA         | NA         | Headache, vomiting | NA         | Headache, cerebral edema | Headache, irritability, vomiting | rash       |
|                               | CSF Glucose level (mg/dl)        | 66.1                       | 125        | 38.3       | 15                                 | 60.9               | ND         | 32         | ND         | ND                 | 22         | 53                       | ND                               | ND         |
|                               | CSF protein level (mg/dl)        | 73.6                       | 50.2       | 51.1       | 258                                | 62.4               | ND         | 73         | ND         | ND                 | 44         | 69                       | ND                               | ND         |
|                               | CSF WBC (count/mm <sup>3</sup> ) | 5                          | 5          | 4          | 14                                 | 13                 | ND         | 5          | ND         | ND                 | 40         | 20                       | ND                               | ND         |
|                               | Outcome of Hospitalization       | LAMA                       | R&D        | R&D        | LAMA                               | R&D                | R&D        | R&D        | R&D        | R&D                | Died       | R&D                      | R&D                              | R&D        |
| <b>Microbiological Tests*</b> | JE IgM (CSF)                     | -                          | -          | -          | -                                  | -                  | -          | -          | -          | +                  | -          | +                        | -                                | -          |
|                               | JE IgM                           | N.D                        | N.D        | N.D        | -                                  | -                  | -          | N.D        | -          | N.D                | +          | +                        | N.D                              | -          |

|  | ID                                   | BDN-18-005 | BDN-18-046 | BDN-18-064 | BDN-18-195 | BDN-18-200 | BKR-18-160 | BKR-18-188 | BKR-18-202 | BDN-17-357 | DJL-17-157 | BDN-17-344                 | BDN-18-017 | BDN-18-181   |
|--|--------------------------------------|------------|------------|------------|------------|------------|------------|------------|------------|------------|------------|----------------------------|------------|--------------|
|  | (Serum)                              |            |            |            |            |            |            |            |            |            |            |                            |            |              |
|  | Scrub typhus IgM (Serum)             | N.D        | N.D        | N.D        | -          | -          | -          | N.D        | -          | N.D        | -          | -                          | N.D        | +            |
|  | WNV IgM (Serum)                      | N.D        | N.D        | N.D        | -          | -          | -          | N.D        | N.D        | N.D        | -          | +                          | N.D        | -            |
|  | <i>Leptospira sp</i> IgM (Serum)     | ND         | N.D        | N.D        | -          | -          | -          | N.D        | N.D        | N.D        | -          | +                          | N.D        | -            |
|  | CHIKV IgM (Serum)                    | N.D        | N.D        | N.D        | -          | -          | -          | N.D        | N.D        | N.D        | -          | -                          | N.D        | -            |
|  | DENV IgM (Serum)                     | N.D        | N.D        | N.D        | -          | -          | -          | N.D        | -          | N.D        | -          | +                          |            | -            |
|  | DENV NS1 (Serum)                     | N.D        | N.D        | N.D        | -          | -          | -          | N.D        |            | N.D        | -          | -                          |            | -            |
|  | Malaria (Rapid test)                 | N.D        | -          | -          | N.D        | N.D        | -          | -          | -          | -          | -          | -                          | -          | -            |
|  | SP PCR(CSF)                          | -          | -          | -          | -          | -          | -          | -          | -          | -          | -          | -                          | +          | -            |
|  | HSV PCR (CSF)                        | -          | N.D        | N.D        | N.D        | N.D        | N.D        | N.D        |            | -          | -          | -                          | -          | N.D          |
|  | Enterovirus PCR (CSF)                | -          | N.D        | N.D        | N.D        | N.D        | N.D        | N.D        |            | -          | -          | N.D                        | -          | N.D          |
|  | Triplex PCR (CSF)                    | -          | -          | -          | -          | -          | -          | -          | -          | -          | -          | ND                         | -          | -            |
|  | Microbiological/Aetiologic Diagnosis | AES Unkwn  | AES Unkwn  | AES Unkwn  | AES Unkwn  | AES Unkwn  | AES Unkwn  | AES Unkwn  | AES Unkwn  | JE         | JE         | JEV+WNV+DENV+Leptospira sp | SP         | Scrub Typhus |

CHIKV = Chikungunya virus, DENV = Dengue viruses, JE = Japanese Encephalitis, JEV= Japanese encephalitis virus, SP = Streptococcus pneumoniae, WNV= West Nile Virus, HSV = Herpes Simplex Virus 1, LAMA = Left against medical advice, R&D = Recovered and Discharged, AES = Acute Encephalitis Syndrome, AMES = Acute Meningoencephalitis Syndrome . \*All Samples were negative for Haemophilus influenzae and Neisseria meningitidis by PCR.

### Appendix 3: Description of PCR results and recovered genomes

| Sample     | Ct value | Filtered Reads | % Mapped | % Refseq (1X coverage) | % RefSeq (10 X coverage) | Average Depth | GenBank_Accession |
|------------|----------|----------------|----------|------------------------|--------------------------|---------------|-------------------|
| BDN-17-344 | 27       | 116520         | 79.65    | 99.8                   | 99.71                    | 9533.45       | OK482570          |
| BDN-17-357 | 24       | 91310          | 79.17    | 99.8                   | 99.73                    | 7075.85       | OK482571          |
| BDN-18-005 | 35       | 27732          | 76.91    | 98.4                   | 93.47                    | 2864.9        | OK482572          |
| BDN-18-017 | 22       | 13559          | 52.28    | 97.4                   | 79.9                     | 823.73        | OK482573          |
| BDN-18-046 | 35       | 18300          | 58.71    | 99.7                   | 98.62                    | 1270.3        | OK482574          |
| BDN-18-064 | 18       | 123227         | 80.41    | 100                    | 100                      | 13540.9       | OK482575          |
| BDN-18-181 | 14       | 86150          | 79.95    | 100                    | 100                      | 14685.5       | OK482576          |
| BDN-18-195 | 18       | 81711          | 77.34    | 99.9                   | 99.85                    | 7155.4        | OK482577          |
| BDN-18-200 | 23       | 141235         | 79.21    | 100                    | 99.87                    | 11715.6       | OK482578          |
| BKR-18-160 | 22       | 232231         | 81.59    | 99.9                   | 99.75                    | 22510         | OK482579          |
| BKR-18-188 | 34       | 68234          | 80.87    | 99.8                   | 99.69                    | 5578.5        | OK482580          |
| BKR-18-202 | 30       | 335815         | 80.68    | 100                    | 99.73                    | 27908         | OK482581          |
| DJL-17-157 | 32       | 23             | 70.37    | 76.1                   | -                        | 1.58          | -                 |



#### Appendix 4: List of unique SNPs in B19V genomes from the study

| Ref Position<br>(NC_004295<br>) | BDN-<br>18-<br>017 | BDN-<br>18-<br>005 | BDN-<br>18-<br>046 | BDN-<br>18-<br>344 | BDN-<br>18-<br>064 | BDN-<br>18-<br>181 | BDN-<br>18-<br>200 | BDN-<br>18-<br>195 | BKR-<br>18-<br>188 | BKR-<br>18-<br>202 | BKR-<br>18-<br>160 | BDN-<br>17-<br>357 |
|---------------------------------|--------------------|--------------------|--------------------|--------------------|--------------------|--------------------|--------------------|--------------------|--------------------|--------------------|--------------------|--------------------|
| 815                             | N                  | N                  | <b>G</b>           | C                  | C                  | C                  | C                  | C                  | C                  | C                  | C                  | C                  |
| 1110                            | G                  | G                  | G                  | G                  | G                  | G                  | G                  | G                  | <b>A</b>           | G                  | G                  | G                  |
| 2142                            | T                  | T                  | T                  | <b>C</b>           | T                  | T                  | T                  | T                  | T                  | T                  | T                  | T                  |
| 2467                            | T                  | T                  | T                  | <b>C</b>           | T                  | T                  | T                  | T                  | T                  | T                  | T                  | T                  |
| 2634                            | G                  | G                  | <b>C</b>           | <b>C</b>           | G                  | G                  | G                  | G                  | G                  | G                  | G                  | G                  |
| 2702                            | A                  | A                  | A                  | A                  | A                  | A                  | <b>G</b>           | A                  | A                  | A                  | A                  | A                  |
| 3313                            | N                  | T                  | <b>C</b>           | T                  | <b>C</b>           | T                  | T                  | T                  | T                  | T                  | T                  | T                  |
| 3778                            | <b>C</b>           | T                  | T                  | T                  | T                  | T                  | T                  | T                  | T                  | T                  | T                  | T                  |
| 3910                            | G                  | G                  | G                  | <b>T</b>           | G                  | G                  | G                  | G                  | G                  | G                  | G                  | G                  |
| 3943                            | A                  | A                  | A                  | <b>T</b>           | A                  | A                  | A                  | A                  | A                  | A                  | A                  | A                  |
| 4255                            | T                  | T                  | T                  | <b>C</b>           | T                  | T                  | T                  | T                  | T                  | T                  | T                  | T                  |
| 4258                            | G                  | G                  | G                  | G                  | G                  | G                  | <b>A</b>           | G                  | G                  | G                  | G                  | G                  |
| 4360                            | <b>A</b>           | G                  | G                  | <b>A</b>           | G                  | G                  | G                  | G                  | G                  | G                  | G                  | <b>A</b>           |
| 4468                            | A                  | A                  | A                  | <b>G</b>           | A                  | A                  | A                  | A                  | A                  | A                  | A                  | A                  |
| 4531                            | T                  | T                  | <b>G</b>           | <b>G</b>           | T                  | T                  | T                  | T                  | T                  | T                  | T                  | T                  |
| 4708                            | G                  | G                  | G                  | <b>A</b>           | G                  | G                  | G                  | G                  | G                  | G                  | G                  | G                  |
| 4758                            | C                  | C                  | C                  | C                  | C                  | <b>G</b>           | <b>G</b>           | C                  | C                  | C                  | C                  | C                  |
| Unique<br>mutation<br>count     | 2                  | 0                  | 4                  | 10                 | 1                  | 1                  | 3                  | 0                  | 1                  | 0                  | 0                  | 1                  |
